# Supplementary material for: Triazine-based porous organic polymers with enhanced electronegativity as multifunctional separator coatings in lithium–sulfur batteries
Source: Royal Society of Chemistry journal article supplement (doi:10.1039/d1nr02980k), 2021-01-01
Supplement: d1nr02980k1.pdf [file d1nr02980k1.pdf]

## Supplementary information

# **Triazine-based Porous Organic Polymer with Enhanced Electronegativity as Multifunctional Separator Coating in Lithium-Sulfur Batteries**

Jinchen Zhao<sup>a</sup>, Gaojie Yan<sup>a</sup>, Zongjie Hu<sup>a</sup>, Xiaojie Zhang<sup>a\*</sup>, Jingjing Shi<sup>b\*</sup> and Xiaoxia Jiang<sup>c</sup>

<sup>a</sup> Hebei Key Laboratory of Functional Polymers, Department of Polymer Materials and Engineering, Hebei University of Technology, 8 Guangrong Street, Tianjin 300130, P. R. China

<sup>b</sup> School of Science, Nantong University, Nantong, 226019, Jiangsu Province, P. R. China

<sup>c</sup> School of Chemical Engineering and Technology, Hebei University of Technology, Tianjin 300130, P. R. China

\* Corresponding author E-mail addresses: [zhangxj@hebut.edu.cn](mailto:zhangxj@hebut.edu.cn) (X. Zhang); [shijingjing@ntu.edu.cn](mailto:shijingjing@ntu.edu.cn) (J. Shi)

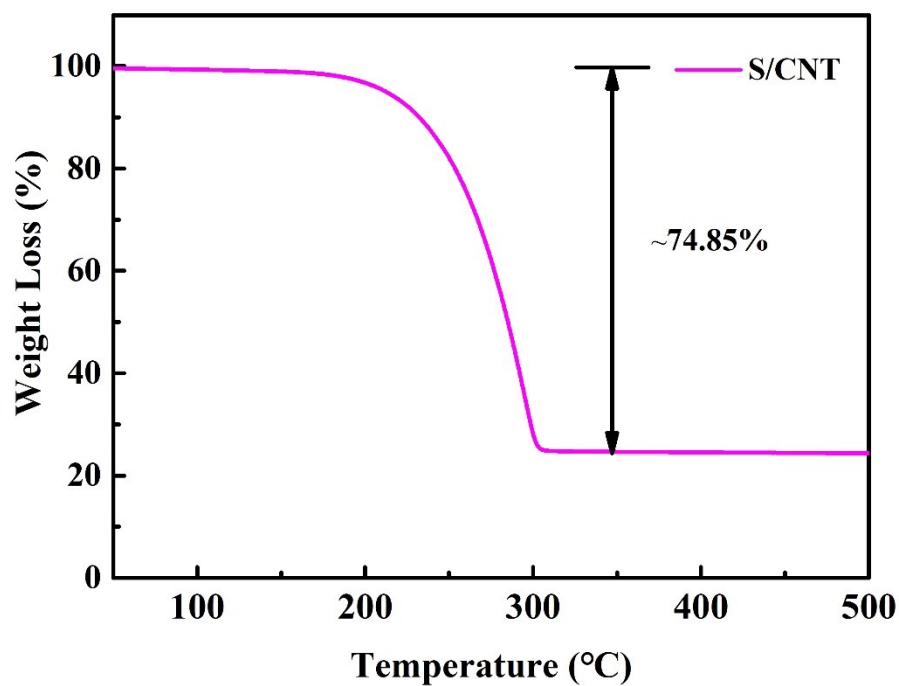

Figure S1. TG curves of S/CNTs.

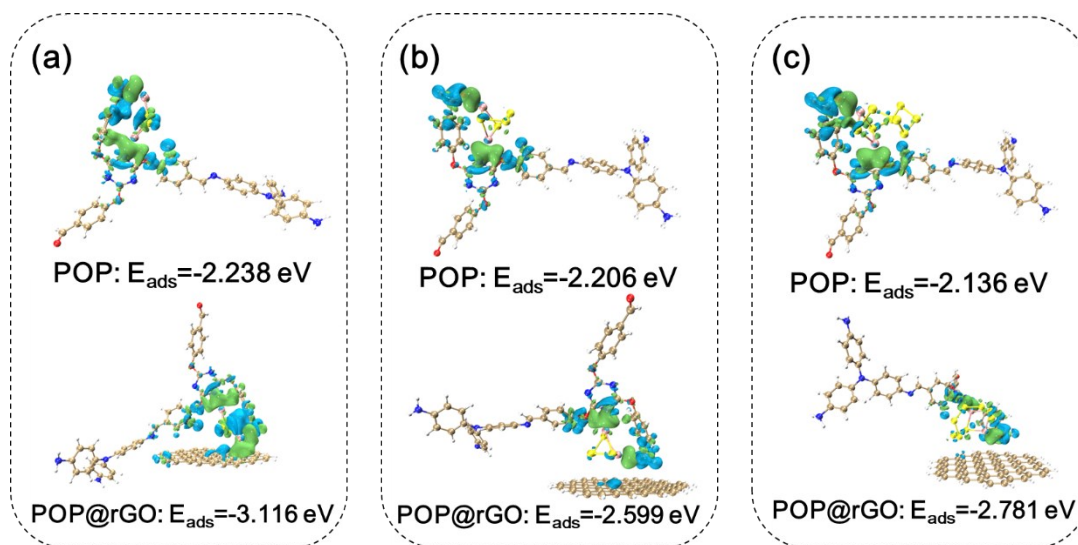

Figure S2. Charge density differences and binding energy of (a) POP-Li<sub>2</sub>S<sub>2</sub> and POP@rGO-Li<sub>2</sub>S<sub>2</sub>, (b) POP-Li<sub>2</sub>S<sub>4</sub> and POP@rGO-Li<sub>2</sub>S<sub>4</sub>, (c) POP-Li<sub>2</sub>S<sub>8</sub> and POP@rGO-Li<sub>2</sub>S<sub>8</sub>.

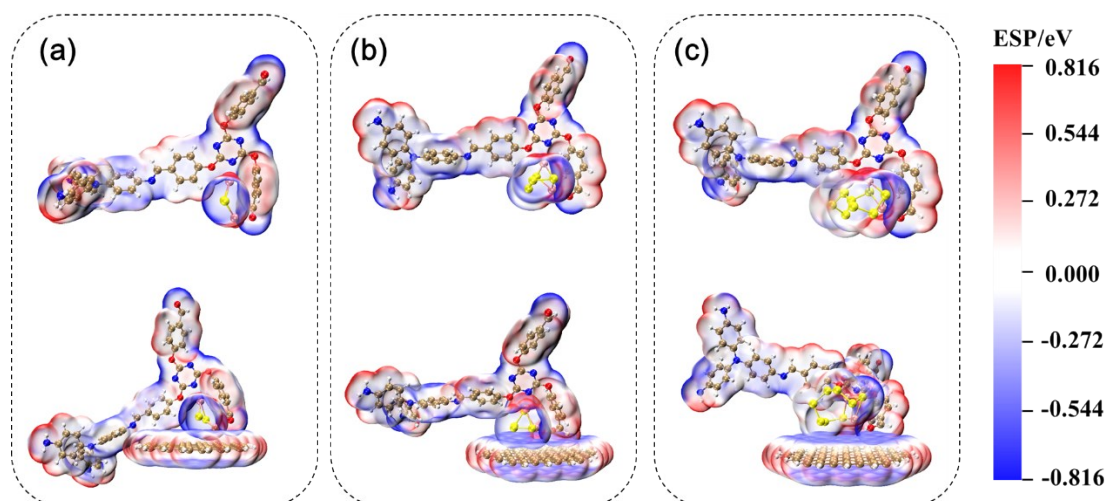

Figure S3. Electrostatic potential of (a) POP-Li<sub>2</sub>S<sub>2</sub> and POP@rGO-Li<sub>2</sub>S<sub>2</sub>, (b) POP-Li<sub>2</sub>S<sub>4</sub> and POP@rGO-Li<sub>2</sub>S<sub>4</sub>, (c) POP-Li<sub>2</sub>S<sub>8</sub> and POP@rGO-Li<sub>2</sub>S<sub>8</sub>.

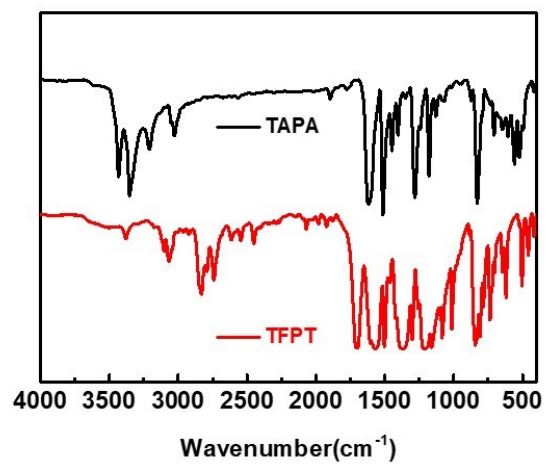

Figure S4. FT-IR spectrum of the TAPA and TFPT.

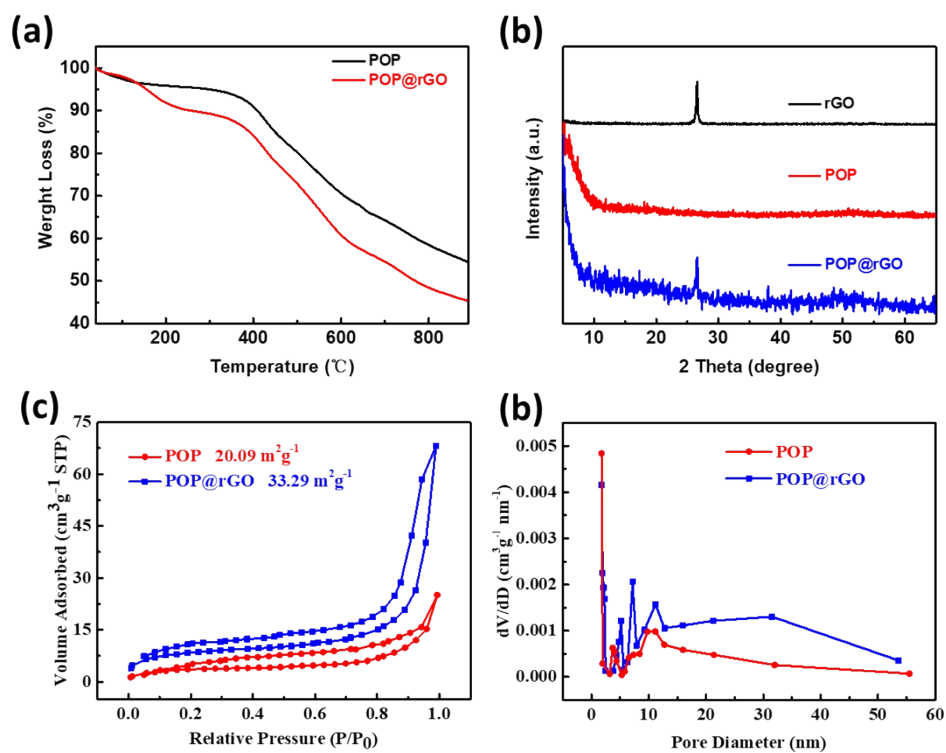

Figure S5. (a) TG curves of POP and POP@rGO. (b) XRD patterns of rGO, POP and POP@rGO. (c) N<sub>2</sub> adsorption-desorption isotherm and (d) pore size distribution of POP and POP@rGO.

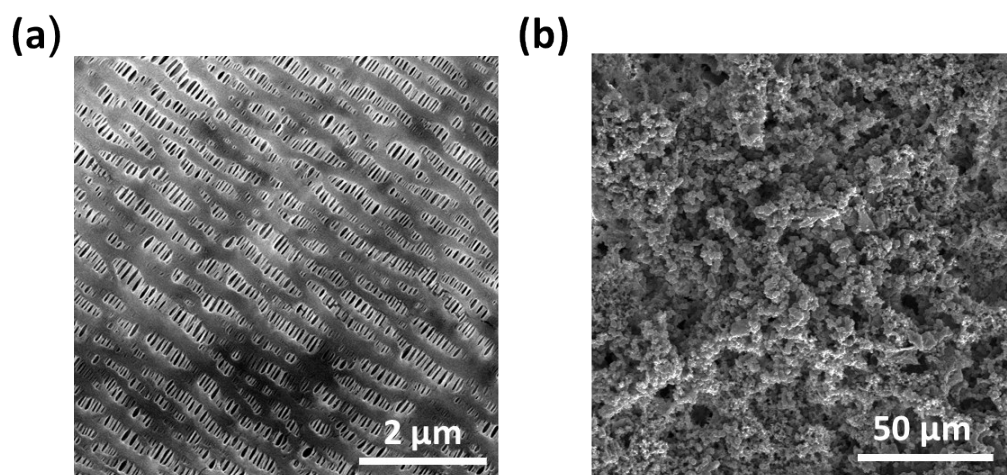

Figure S6. Top surface SEM images of (a) routine PP Celgard, (b) POP-PP.

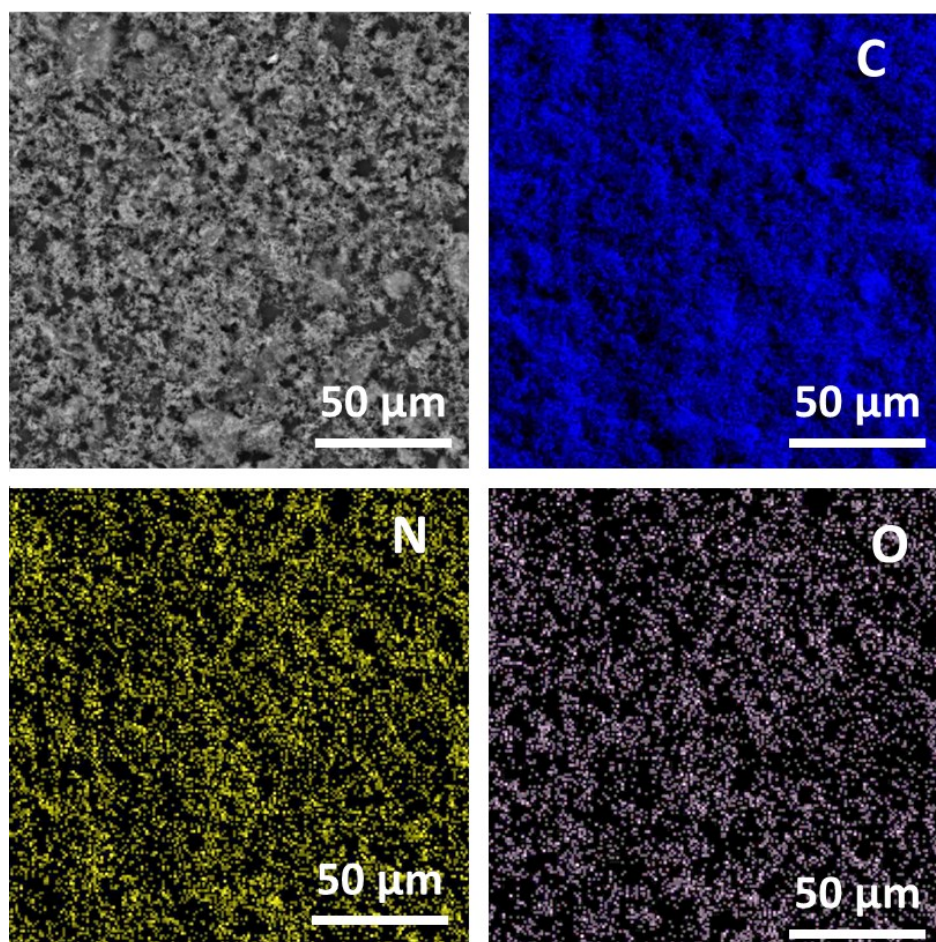

Figure S7. Top surface SEM elemental mapping of POP@rGO-PP.

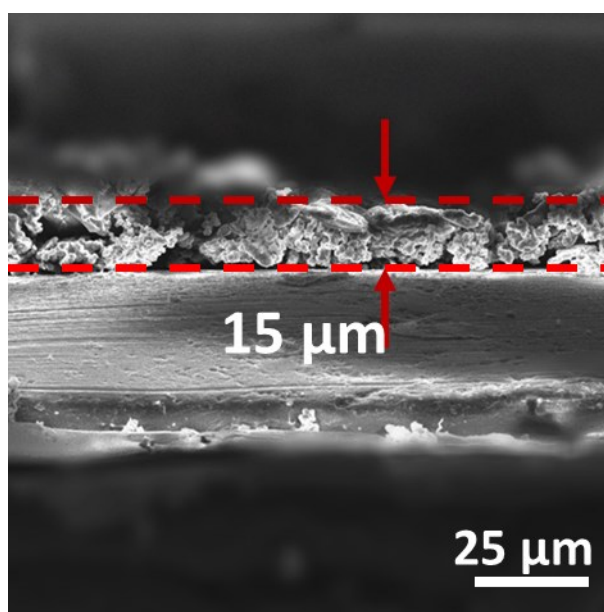

Figure S8. Cross-section SEM image of the POP@rGO-modified separator.

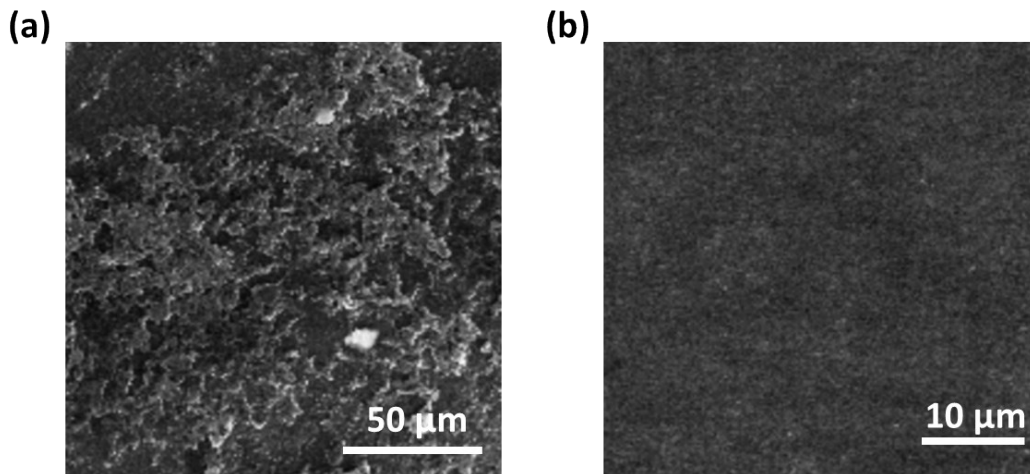

Figure S9. The top surface SEM images of (a) POP@rGO-PP and (b) PP separator facing to Li anode after 100 cycles at 0.2 C.

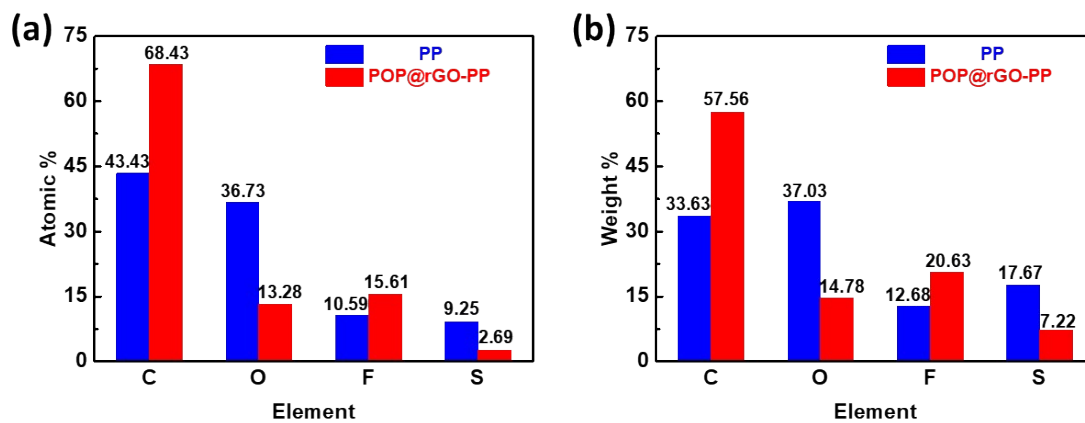

Figure S10. Bar chart of elemental analysis with various separator surfaces facing to Li anode after 100 cycles at 0.2 C.

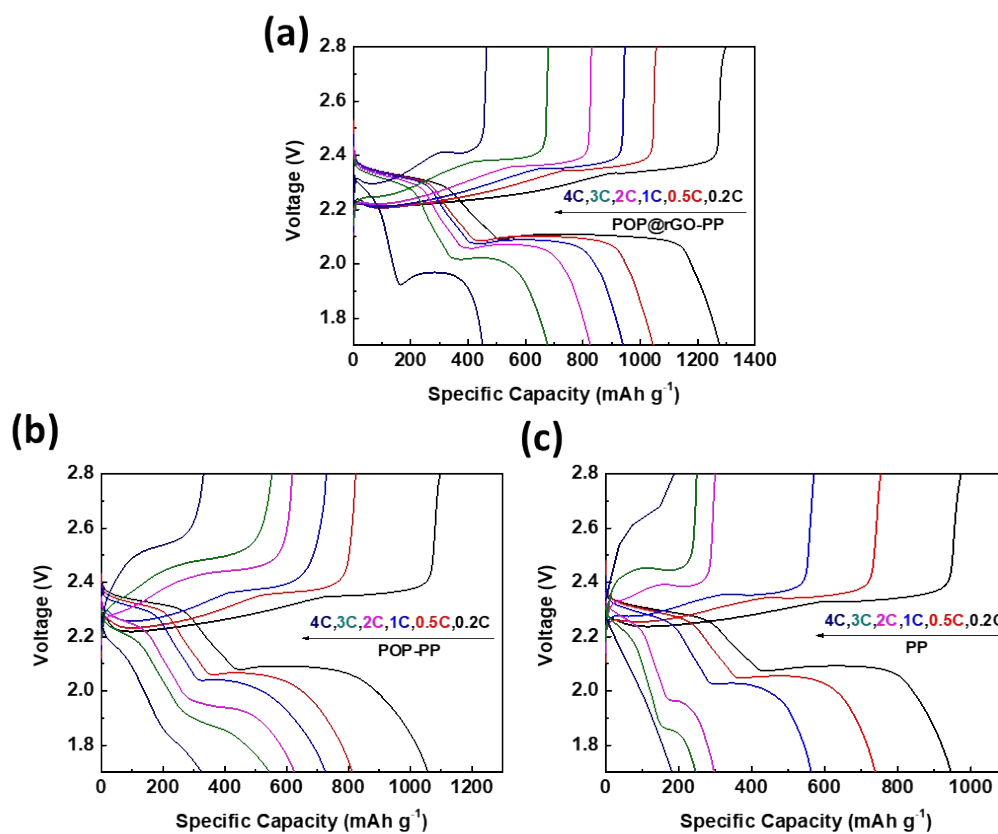

Figure S11. Charge-discharge profiles of Li-S battery with (a) POP@rGO-PP, (b) POP-PP and (c) PP separator at various current densities.

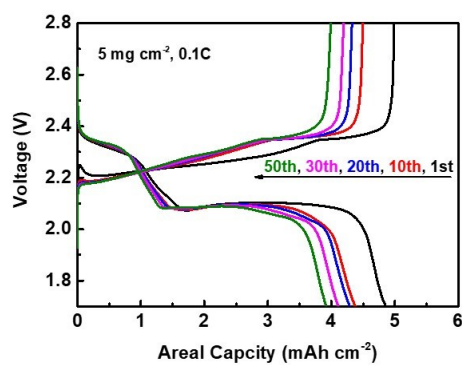

Figure S12. Charge-discharge profiles of cell with the POP@rGO-PP separator at 0.1 C with sulfur loading of  $5 \text{ mg cm}^{-2}$ .

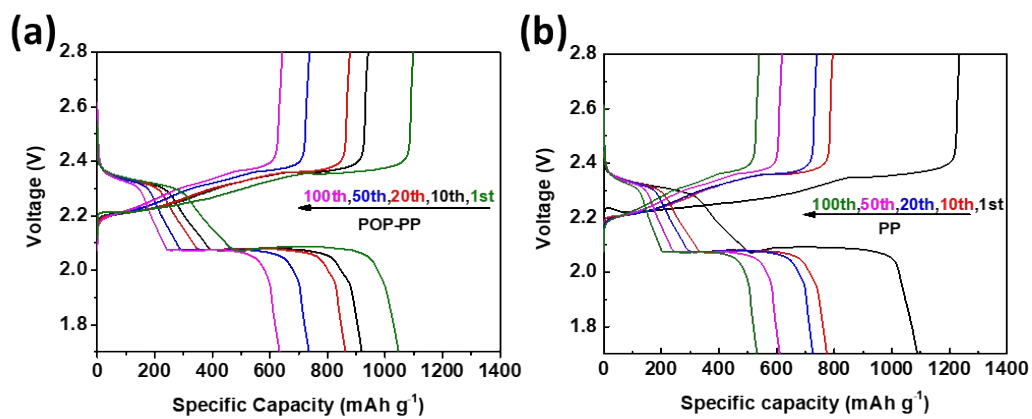

Figure S13. Charge-discharge profiles of cell with the POP-PP and PP separator at 0.2 C.

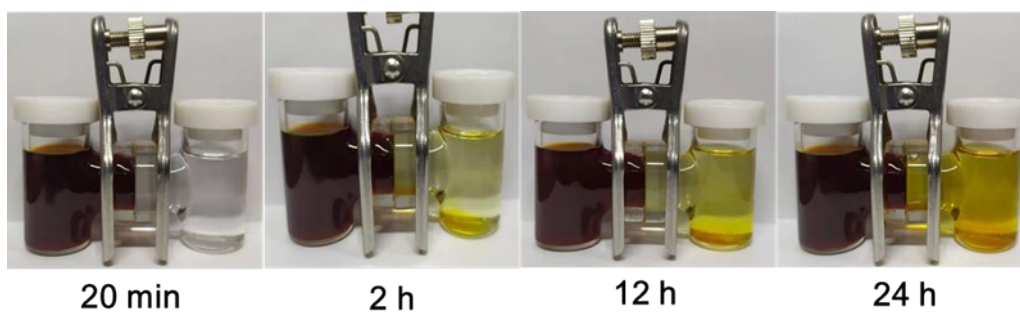

Figure S14. LiPSs diffusion in H-type cells with POP-modified PP separator.

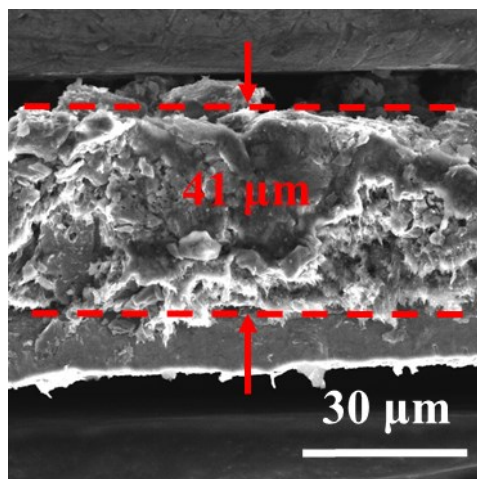

Figure S15. The cross-section SEM image of the S/CNTs cathode at sulfur loading 5 mg cm<sup>-2</sup>.



Table S1. Performance comparison of the various materials as functional separator coating in Li-S batteries.

| Sample                              | coating Thickness ( $\mu\text{m}$ ) | S content (wt %) | Cycling Rate (C) | Initial Capacity (mAh/g) | Capacity Decay (%) | Ref.      |
|-------------------------------------|-------------------------------------|------------------|------------------|--------------------------|--------------------|-----------|
| RGO@MOS <sub>2</sub>                | 8                                   | 70               | 0.2              | 1122                     | 0.1                | S1        |
| HKUST(Zn)@GO                        | ~13                                 | 70               | 1                | 1100                     | 0.005              | S2        |
| MnO <sub>2</sub>                    | 0.38                                | 65               | 0.5              | 899                      | 0.06               | S3        |
| Black P                             | -                                   | 66               | 0.5              | 930                      | 0.14               | S4        |
| GO                                  | 30                                  | 70               | 0.5              | 1400                     | 0.003              | S5        |
| COF-CNT                             | -                                   | 75               | 0.2              | 1130                     | 0.13               | S6        |
| MoS <sub>2</sub> /Polymer           | 3                                   | 60               | 1                | 1007                     | 0.029              | S7        |
| N-Ti <sub>3</sub> C <sub>2</sub> /C | 6                                   | 79               | 0.5              | 1107                     | 0.07               | S8        |
| SSNS/CNT                            | 10                                  | 52               | 1.675            | ~780                     | 0.049              | S9        |
| Ni <sub>3</sub> FeN/G               | -                                   | 63               | 1                | 1047                     | -                  | S10       |
| CNF/CoS/KB                          | ~6                                  | 70               | 0.5              | 1078                     | 0.15               | S11       |
| POP@rGO                             | 15                                  | 68               | 0.2              | 1242.7                   | 0.002              | This work |
|                                     |                                     |                  | 1                | 913.7                    | 0.04               |           |

## References

1. L. Tan, X.H. Li, Z.X. Wang, H. Guo, J.X. Wang, *ACS Appl. Mater. Inter.*, 2018, **10**, 3707-3713.
2. S.Y. Bai, K. Zhu, S.C. Wu, Y.R. Wang, J. Yi, M. Ishida, H.S. Zhou, *J. Mater. Chem. A.*, 2016, **4**, 16812-16817.
3. X. Song, G.P. Chen, S.Q. Wang, Y.P. Huang, Z.Y. Jiang, L.X. Ding, H.H. Wang, *ACS Appl. Mater. Inter.*, 2018, **10**, 26274-26282.
4. J. Sun, Y.M. Sun, M. Pasta, G.M. Zhou, Y.Z. Li, W. Liu, F. Xiong, Y. Cui, *Adv. Mater.*, 2016, **28**, 9797-9803.
5. M. Shaibani, A. Akbari, P. Sheath, C.D. Easton, P.C. Banerjee, K. Konstas, A. Fakhfour, M. Barghamadi, M.M. Musameh, A.S. Best, T. R  ther, P.J. Mahon, M.R. Hill, A.F. Hollenkamp, M. Majumder., *ACS Nano*, 2016, **10**, 7768-7779.
6. J.T. Yoo, S.J. Cho, G.Y. Jung, S.H. Kim, K.H. Choi, J.H. Kim, C. K. Lee, S.K. Kwak, S.Y. Lee, *Nano Lett.*, 2016, **16**, 3292.
7. J.Y. Wu, H.X. Zeng, X.W. Li, X. X, Y.G. Liao, Z.G. Xue, Y.S. Ye, X.L. Xie, *Adv. Energy Mater.*, 2018, **8**, 1802430.
8. G.Y. Jiang, N. Zheng, X. Chen, G.Y. Ding, Y.H. Li, F.G. Sun, Y.S. Li, *Chem. Eng. J.*, 2019, **373**, 1309-1318.
9. S.S. Yao, J. Cui, J.Q. Huang, Z.H. Lu, Y. Deng, W.G. Chong, J.X. Wu, M.I.U. Hap, F. Ciucci, J.K. Kim, *Adv. Energy Mater.*, 2018, **8**, 1800710.
10. M. Zhao, H.J. Peng, Z.W. Zhang, B.Q. Li, X. Chen, J. Xie, X. Chen, J.Y. Wei, Q. Zhang, J.Q. Huang, *Angew. Chem. Int. Edit.*, 2019, **58**, 3779-3783.
11. Y.B. Yang, S.X. Wang, L.T. Zhang, Y.F. Deng, H. Xu, X.S. Qin, G.H. Chen, *Chem. Eng. J.*, 2019, **369**, 77-86.
